# Supplementary material
Source: HighWire-hosted journal article supplement (https://www.life-science-alliance.org/content/2/2/e201900323/F4)

Raw data for Figure 3D .

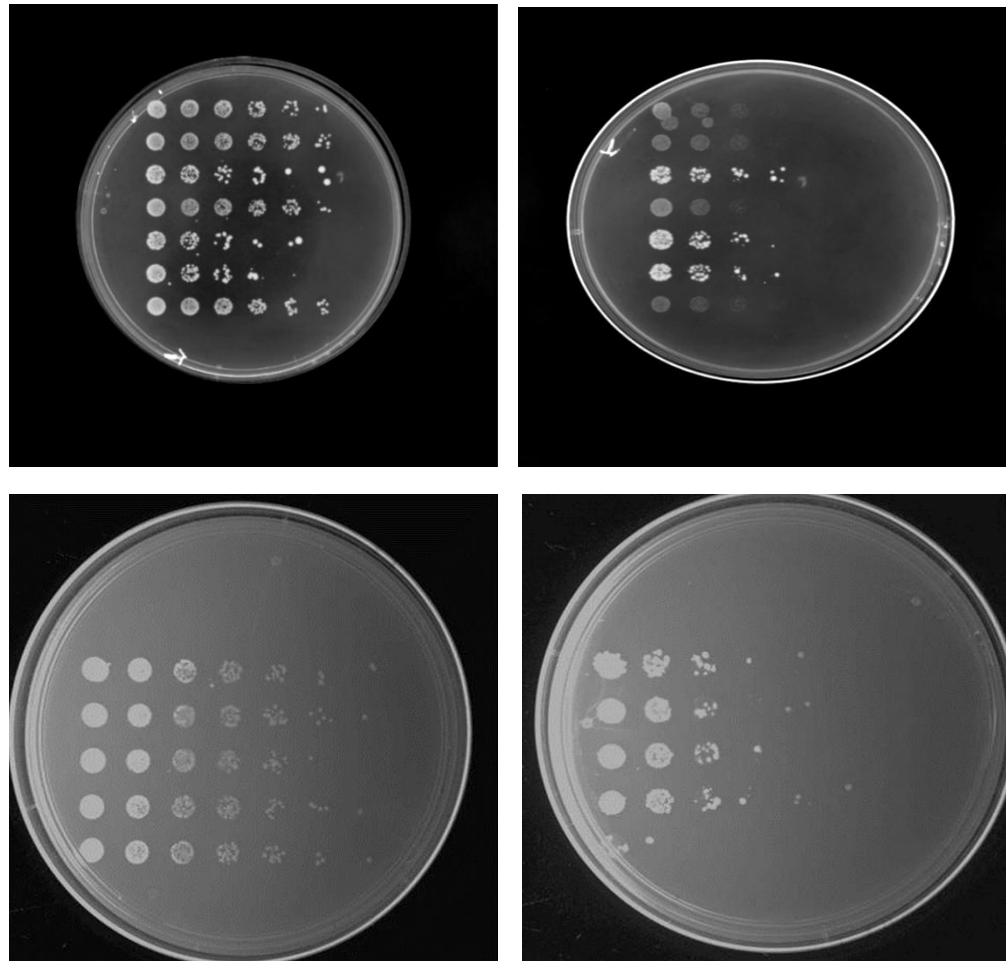

Supplement: inline-supplementary-material-3 [file inline-supplementary-material-3.pdf]
